# Supplementary material for: Modeling Solid-Phase Microextraction of Volatile Organic Compounds by Porous Coatings Using Finite Element Analysis
Source: Preprints.org preprint supplement (doi:10.20944/preprints201901.0321.v1), 2019-01-31
Supplement: Supplementary file 1 [file supplementary]

## Supplementary Material

### **Modeling solid-phase microextraction of volatile organic compounds by porous coatings using finite element analysis**

Bulat Kenessov <sup>1,\*</sup>, Miras Derbissalin <sup>1</sup>, Jacek A. Koziel <sup>2</sup>, Dmitry S. Kosyakov<sup>3</sup>

<sup>1</sup>Center of Physical Chemical Methods of Research and Analysis, Faculty of Chemistry and Chemical Technology, Al-Farabi Kazakh National University, 050012 Almaty, Kazakhstan, [bkenesov@cfhma.kz](mailto:bkenesov@cfhma.kz) (ORCID: 0000-0001-8541-0903), [derbissalin@cfhma.kz](mailto:derbissalin@cfhma.kz) (ORCID: 0000-0001-6928-971X).

<sup>2</sup>Department of Agricultural and Biosystems Engineering, Iowa State University, Ames, IA, USA, [koziel@iastate.edu](mailto:koziel@iastate.edu) (ORCID: 0000-0002-2387-0354)

<sup>3</sup>Core Facility Center “Arktika”, Northern (Arctic) Federal University, Arkhangelsk, Russia, [d.kosyakov@narfu.ru](mailto:d.kosyakov@narfu.ru) (ORCID: 0000-0001-5223-6857)

\* – Corresponding author, 050012 Almaty, 96a Tole bi Street, room 403, Kazakhstan, tel: +7 727 2390624; fax: +7 727 2923731; e-mail: [bkenesov@cfhma.kz](mailto:bkenesov@cfhma.kz).

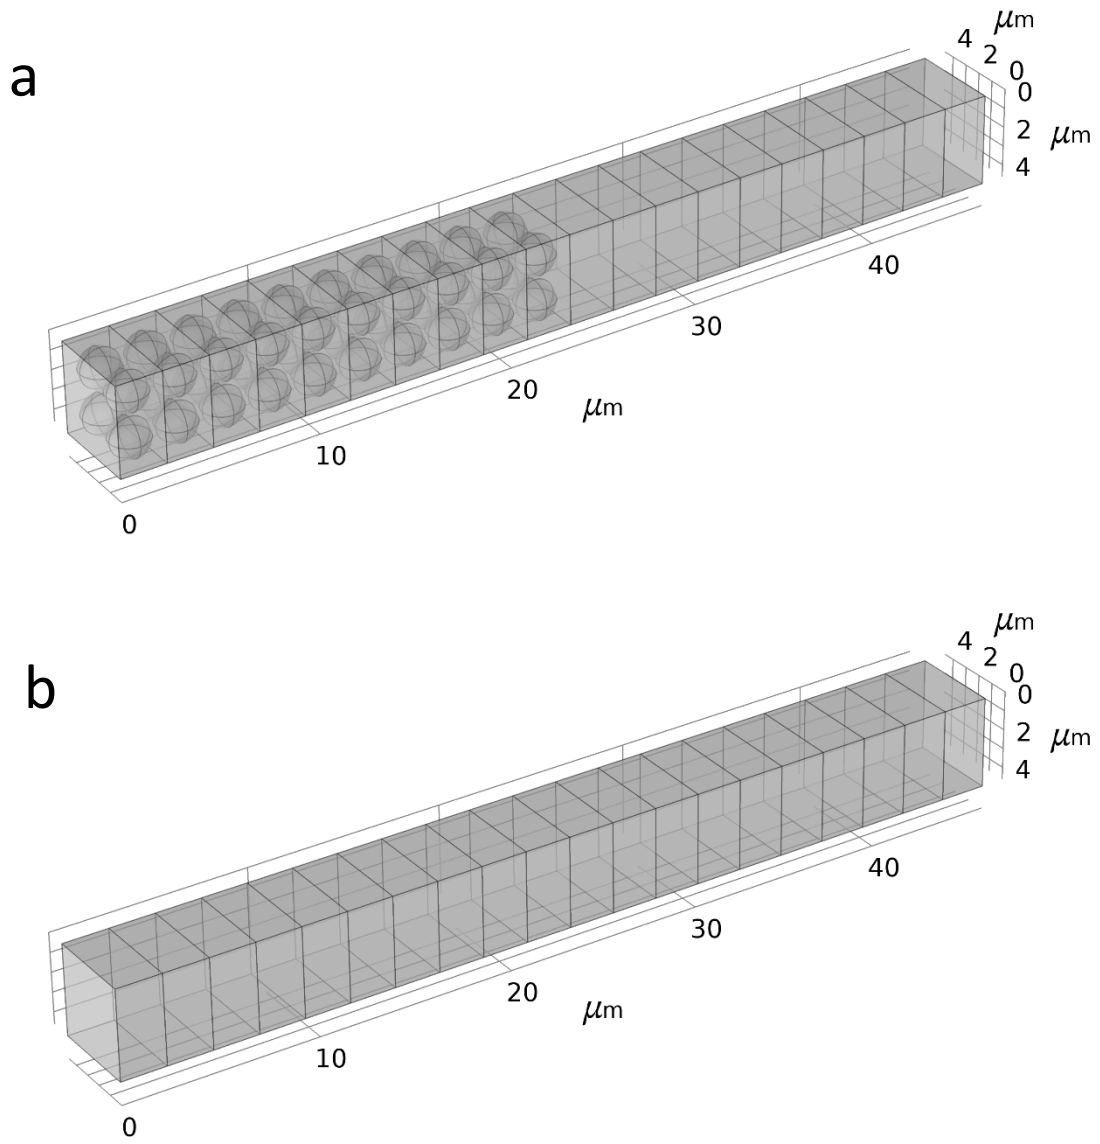

**Fig. A.1** Three-dimensional geometries with particles (a) and without particles (b) used to study mass transport of benzene in a cuboid of Car/PDMS coating. *Note:* Ten small blocks from the right side represent air; ten small blocks from the left side represent the 'slice' of coating. Constant benzene concentration of  $0.641 \mu\text{mol m}^{-3}$  was set at the right edge of the geometry. Initial concentrations in the remaining parts of the geometry was set to zero.
