# Supplementary material for: Modeling Solid-Phase Microextraction of Volatile Organic Compounds by Porous Coatings Using Finite Element Analysis
Source: Preprints.org preprint supplement (doi:10.20944/preprints201901.0321.v1), 2019-01-31
Supplement: Supplementary file 2 [file supplementary]

Archive with 2 entries (2 files):
- ModelingParameters.txt
- SM.pdf
