# Supplementary material for: Modeling Solid-Phase Microextraction of Volatile Organic Compounds by Porous Coatings Using Finite Element Analysis
Source: Preprints.org preprint supplement (doi:10.20944/preprints201901.0321.v1), 2019-01-31
Supplement: Supplementary file 2 [file supplementary › ModelingParameters.txt]

KfaB 150000 "Dimensionless benzene distribution constant between fiber and air"
CoreD .13[mm] "Diameter of fiber core"
CoatTh .08[mm] "Coating thickness"
PartPor 0.37 "Porosity of particles"
PartDen 1000[kg/m^3] "Density of particles"
InterPartPor .67 "Inter-particle porosity"
CoatPor InterPartPor+PartPor*(1-InterPartPor) "Total coating porosity"
CoatDen PartDen*(1-InterPartPor) "Coating density"
Kfa1 KfaB/CoatDen "Benzene distribution constant between fiber and air"
CoatTort CoatPor+1.5*(1-CoatPor) "Coating tortuosity"
DiffCbA 8.8E-6[m^2/s] "Benzene diffusion coefficient in air"
VialV 20[ml] "Vial volume"
VialD 20[mm] "Vial diameter"
VialH VialV*4/pi/VialD^2 "Vial height"
FiberL 10[mm] "Fiber length"
WaterV "12 [ml]" "Water volume"
WaterH WaterV*4/pi/VialD^2 "Water height"
HSH VialH-WaterH "Headspace height"
FiberH 10[mm] "Fiber height"
HLC 0.227 "Henry's law constant"
CiniW 6.41e-7[mol/l] "Initial benzene concentration in water"
FluxC 1000[m/s] "Flux coefficient"
